# Supplementary material for: Spacing between core recognition motifs determines relative orientation of AraR monomers on bipartite operators
Source: PubMed Central journal article supplement — Nucleic Acids Res. 2012 Oct 29;41(1):639–47. doi: 10.1093/nar/gks962 (PMC3592433; doi:10.1093/nar/gks962), 2012-10-29
Supplement: supp_gks962_nar-01571-h-2012-File009.pdf [file supp_gks962_nar-01571-h-2012-File009.pdf]

A

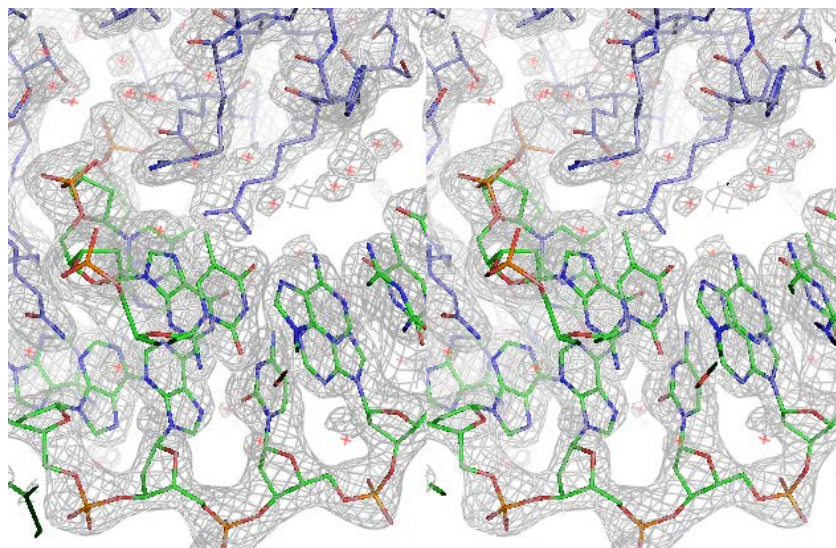

B

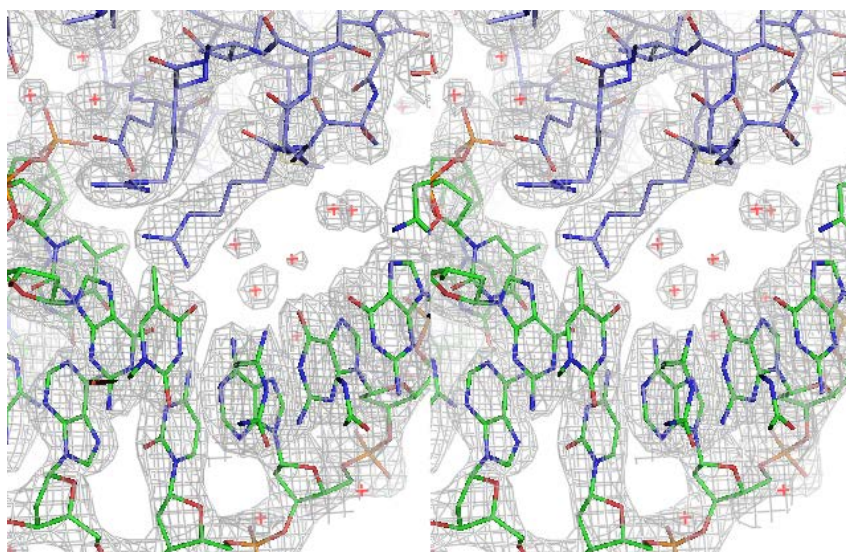

**S1. Electron density map.** Stereo images of a section of the electron density map (2fo-fc) is displayed ( $\sigma=1.2$ ) for (A) ArRNTD<sub>ORA1</sub> and (B) ArRNTD<sub>ORR3</sub>. The DNA and protein are shown in stick representation. C, O, N and P atoms of DNA are coloured green, red, blue and orange, respectively. The carbon atoms of ArRNTD are displayed in slate blue colour and rest of the atoms of protein are coloured as in DNA.
